# Supplementary material for: Electromagnetic navigation bronchoscopy as an adjunct diagnostic tool in the Danish lung cancer diagnostic pathway: an initial retrospective single centre series
Source: PubMed Central journal article supplement — J Thorac Dis. 2020 Sep;12(9):4762–70. doi: 10.21037/jtd-20-1236 (PMC7578505; doi:10.21037/jtd-20-1236), 2020-09
Supplement: jtd-12-09-4762-dss.pdf [file jtd-12-09-4762-dss.pdf]

## Data Sharing Statement

|                     |                                                                                                                                                    |                                                                                                                                       |
|---------------------|----------------------------------------------------------------------------------------------------------------------------------------------------|---------------------------------------------------------------------------------------------------------------------------------------|
| <b>Article Info</b> | <a href="http://dx.doi.org/10.21037/jtd-20-1236">http://dx.doi.org/10.21037/jtd-20-1236</a> .                                                      |                                                                                                                                       |
| <b>Item</b>         | <b>Question</b>                                                                                                                                    | <b>Authors' Response<br/>(place "-" if not applicable)</b>                                                                            |
| 1                   | Would you like to share data collected for your study to others?                                                                                   | Yes                                                                                                                                   |
| 2                   | If not, would you like to share the reason for your decision?                                                                                      | -                                                                                                                                     |
| 3                   | What data in particular will be shared?                                                                                                            | Raw data on the variables presented in the study                                                                                      |
| 4                   | Any other documents will be share? Such as study protocol, statistical analysis plan, informed consent form, clinical study report, analytic code. | -                                                                                                                                     |
| 5                   | When will data availability begin?                                                                                                                 | From publication date                                                                                                                 |
| 6                   | When will data availability end?                                                                                                                   | Two years after the publication date                                                                                                  |
| 7                   | To whom will you share the data?                                                                                                                   | Respiratory physicians and thoracic surgeons who are interested in studies of ENB and diagnostic methods concerning pulmonary lesions |
| 8                   | For what type of analysis or purpose?                                                                                                              | For analysis to evaluate the performance of ENB.                                                                                      |
| 9                   | How or where can the data/documents be obtained?                                                                                                   | Data can be obtained on request to the following email: Michael.stenger@rsyd.dk                                                       |
| 10                  | Any other restrictions?                                                                                                                            | We may balance the potential benefits and risks for each request and then provide the data that could be shared.                      |
